# Supplementary material for: Effect of In-Utero Antibiotic Exposure on Childhood Outcomes: Methods and Baseline Data of the Fetal Antibiotic EXposure (FAX) Cohort Study
Source: PubMed Central journal article supplement (PMC6691671; doi:10.2196/12065), 2019-07-30
Supplement: resprot_v8i7e12065_app1.pdf [file resprot_v8i7e12065_app1.pdf]

## Multimedia Appendix:

Characteristics of infants born 2007-2015 and enrolled in the FAX study.

| Variable                                 | Total          | <i>In-utero</i> exposure to antibiotics |                        |               |                                      |
|------------------------------------------|----------------|-----------------------------------------|------------------------|---------------|--------------------------------------|
|                                          | Infant cohort  | None                                    | Pregnancy <sup>a</sup> | Intrapartum   | Pregnancy <sup>a</sup> + Intrapartum |
| n (%)                                    | 223431         | 76711                                   | 42511                  | 66896         | 37313                                |
| <b>Sex, male</b>                         | 114464 (51.23) | 38325 (49.96)                           | 21513 (50.61)          | 35101 (52.47) | 19525 (52.33)                        |
| <b>Race and Ethnicity</b>                |                |                                         |                        |               |                                      |
| White                                    | 63085 (28.23)  | 22866 (29.81)                           | 11261 (26.49)          | 19560 (29.24) | 9398 (25.19)                         |
| Hispanic                                 | 105699 (47.31) | 36238 (47.24)                           | 22047 (51.86)          | 29366 (43.90) | 18048 (48.37)                        |
| Black                                    | 18934 (8.47)   | 4675 (6.09)                             | 4138 (9.73)            | 5417 (8.10)   | 4704 (12.61)                         |
| API                                      | 27937 (12.50)  | 10153 (13.24)                           | 3781 (8.89)            | 10010 (14.96) | 3993 (10.70)                         |
| Others and Unknown                       | 7776 (3.48)    | 2779 (3.62)                             | 1284 (3.02)            | 2543 (3.80)   | 1170 (3.13)                          |
| <b>Maternal education</b>                |                |                                         |                        |               |                                      |
| <High school                             | 10969 (4.91)   | 4020 (5.24)                             | 2588 (6.09)            | 2678 (4.00)   | 1683 (4.51)                          |
| High school                              | 55668 (24.92)  | 18879 (24.61)                           | 11979 (28.18)          | 15211 (22.74) | 9607 (25.75)                         |
| Some college                             | 67772 (30.30)  | 21750 (28.35)                           | 14067 (33.09)          | 19530 (29.19) | 12425 (33.30)                        |
| Bachelor degree                          | 54001 (24.17)  | 19496 (25.41)                           | 8485 (19.96)           | 17825 (26.65) | 8195 (21.96)                         |
| Graduate or higher                       | 32036 (14.34)  | 11537 (15.04)                           | 4867 (11.45)           | 10736 (16.05) | 4896 (13.12)                         |
| Unknown                                  | 2985 (1.34)    | 1037 (1.35)                             | 525 (1.23)             | 916 (1.37)    | 507 (1.36)                           |
| <b>Neighborhood income</b>               |                |                                         |                        |               |                                      |
| < \$15,000                               | 22657 (10.14)  | 7646 (9.97)                             | 4435 (10.43)           | 6683 (9.99)   | 3893 (10.43)                         |
| \$15,000 to \$34,999                     | 38582 (17.27)  | 12957 (16.89)                           | 7369 (17.33)           | 11459 (17.13) | 6798 (18.22)                         |
| \$35,000 to \$49,999                     | 31015 (13.88)  | 10611 (13.83)                           | 6030 (14.18)           | 9158 (13.69)  | 5217 (13.98)                         |
| \$50,000 to \$74,999                     | 43042 (19.26)  | 14769 (19.25)                           | 8273 (19.46)           | 12825 (19.17) | 7175 (19.23)                         |
| \$75,000 to \$99,999                     | 30944 (13.85)  | 10674 (13.91)                           | 5842 (13.74)           | 9321 (13.93)  | 5107 (13.69)                         |
| \$100,000 to \$149,999                   | 33105 (14.82)  | 11516 (15.01)                           | 6109 (14.37)           | 10079 (15.07) | 5400 (14.47)                         |
| ≥\$150,000                               | 20780 (9.30)   | 7280 (9.49)                             | 3629 (8.54)            | 6499 (9.72)   | 3373 (9.04)                          |
| <b>Government health care assistance</b> | 20071 (8.98)   | 5842 (7.62)                             | 4922 (11.58)           | 4849 (7.25)   | 4458 (11.95)                         |
| <b>Preterm birth#</b>                    | 17191 (7.69)   | 2201 (2.86)                             | 2117 (4.98)            | 7136 (10.67)  | 5737 (15.38)                         |
| <b>Delivery mode</b>                     |                |                                         |                        |               |                                      |
| Vaginal                                  | 156381 (70.00) | 76711 (100.00)                          | 36982 (86.99)          | 24973 (37.33) | 17715 (47.48)                        |
| Cesarean section                         | 67050 (30.00)  | 0 (0.00)                                | 5529 (13.01)           | 41923 (62.67) | 19598 (52.52)                        |
| <b>Small-for-gestational age</b>         | 22026 (9.86)   | 7712 (10.05)                            | 4287 (10.08)           | 6486 (9.70)   | 3541 (9.49)                          |
| <b>Maternal age, years</b>               |                |                                         |                        |               |                                      |

|                                                     |                |               |               |               |               |
|-----------------------------------------------------|----------------|---------------|---------------|---------------|---------------|
| <20                                                 | 7900 (3.54)    | 2745 (3.58)   | 2299 (5.41)   | 1477 (2.21)   | 1379 (3.70)   |
| 20-29                                               | 91292 (40.86)  | 32464 (42.32) | 19445 (45.74) | 24301 (36.33) | 15082 (40.42) |
| 30-34                                               | 73787 (33.02)  | 26200 (34.15) | 12699 (29.87) | 23245 (34.74) | 11643 (31.20) |
| ≥35                                                 | 50452 (22.58)  | 15302 (19.95) | 8068 (18.98)  | 17873 (26.72) | 9209 (24.68)  |
| <b>Maternal pre-pregnancy BMI, kg/m<sup>2</sup></b> |                |               |               |               |               |
| <18.5                                               | 4733 (2.12)    | 1910 (2.49)   | 960 (2.26)    | 1167 (1.74)   | 696 (1.87)    |
| 18.5-22.4                                           | 46387 (20.76)  | 17909 (23.35) | 8481 (19.95)  | 13167 (19.68) | 6830 (18.30)  |
| 22.5-24.9                                           | 38861 (17.39)  | 14047 (18.31) | 7132 (16.78)  | 11464 (17.14) | 6218 (16.66)  |
| 25.0-29.9                                           | 54718 (24.49)  | 17889 (23.32) | 10607 (24.95) | 16512 (24.68) | 9710 (26.02)  |
| 30.0-34.9                                           | 28876 (12.92)  | 7847 (10.23)  | 5653 (13.30)  | 9220 (13.78)  | 6156 (16.50)  |
| 35.0 -39.9                                          | 13386 (5.99)   | 3036 (3.96)   | 2589 (6.09)   | 4409 (6.59)   | 3352 (8.98)   |
| ≥40                                                 | 8050 (3.60)    | 1480 (1.93)   | 1452 (3.42)   | 2795 (4.18)   | 2323 (6.23)   |
| Missing                                             | 28420 (12.72)  | 12593 (16.42) | 5637 (13.26)  | 8162 (12.20)  | 2028 (5.44)   |
| <b>Maternal smoking during pregnancy</b>            | 24231 (10.84)  | 7114 (9.27)   | 5244 (12.34)  | 6946 (10.38)  | 4927 (13.20)  |
| <b>Start of prenatal care</b>                       |                |               |               |               |               |
| ≤ 3 months                                          | 199099 (89.11) | 67659 (88.20) | 38289 (90.07) | 59506 (88.95) | 33645 (90.17) |
| 4-6 months                                          | 19922 (8.92)   | 7306 (9.52)   | 3435 (8.08)   | 6086 (9.10)   | 3095(8.29)    |
| > 6 months                                          | 2386 (1.07)    | 982 (1.28)    | 360 (0.85)    | 759 (1.13)    | 285 (0.76)    |
| No care or missing                                  | 2024 (0.91)    | 764 (1.00)    | 427 (1.00)    | 545 (0.82)    | 288 (0.77)    |
| <b>Parity</b>                                       |                |               |               |               |               |
| 1                                                   | 168219 (75.29) | 57128 (74.47) | 30932 (72.76) | 52279 (78.15) | 27880 (74.72) |
| 2                                                   | 36208 (16.21)  | 12848 (16.75) | 7384 (17.37)  | 9846 (14.72)  | 6130 (16.43)  |
| ≥3                                                  | 19004 (8.51)   | 6735 (8.78)   | 4195 (9.87)   | 4771 (7.13)   | 3303 (8.95)   |

<sup>a</sup>Pregnancy without intrapartum period

# <37 week of gestation
